# Supplementary material
Source: Springer Nature journal article supplement (https://www.springermedizin.de/resource/supplementary/12889_2011_4270_MOESM2_ESM.pdf/9491350)

# DH policy documents

- New government:** "rebuild the NHS"
- Policy direction:** focus on sexual health
- Sexual health strategy:** modernise services=priority
- Public health strategy:** fast-tracks NCSP rollout

## National reviews (sexual health)

**Recommends:**  
£££ for chlamydia diagnostics

**Recommends:**  
screen ♂ outside NHS

## NCSP plans

**Expert Group on chlamydia set up**

**Expert Group:** recommends opportunistic screening

- focus on ♀
- deliver through 1° care

**NCSP announced:** To be introduced in Phases

**Screening expanded to ♂ & new services**

**National rollout due, coverage targets set:**

- NCSP: 15%
- NCSP: 17%
- NCSP & non NCSP: 25%

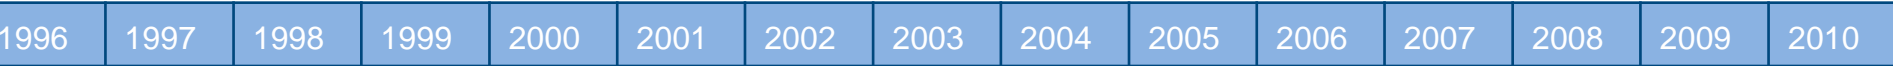

## NCSP delivery

**Pilots:** >50% uptake in 1° care; 11% infected

**Phase 1:** 10 areas  
Uptake low in 1°care

**Phase 2:** 26 areas  
Uptake low in 1°care

**National rollout achieved**

**Coverage:** 4.9%      15.9%      22.1%  
(inc nonNCSP nonGUM)

## Evidence

- RCT (USA):** "↓ pelvic inflammatory disease (PID)"
- Obs (Sweden):** "↓ PID & ectopic pregnancy"
- RCT (Denmark):** "↓ PID"
- NICE review (England):** biases in early trials may overestimate benefits
- Obs (US):** screening does not ↓ chlamydia
- RCT (England):** PID ↓ not significant
- Obs: (Sweden):** chlamydia harms "lower than expected"
- Economic eval: (England)** screening "not cost-effective"

**Reviews find:**  
NCSP not value for money

## National reviews (NCSP)

### Diagnoses in women (16-24y):

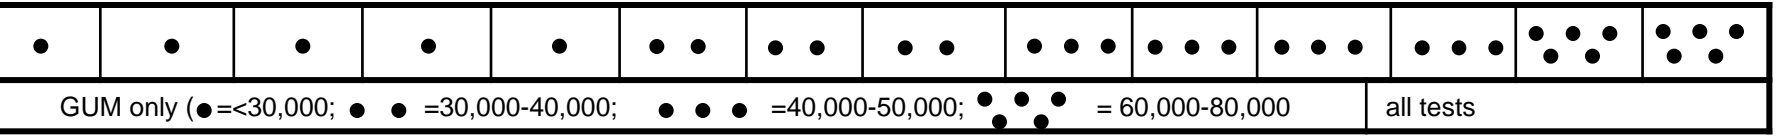

Supplement: MOESM2 [file 9491350]
